# Supplementary material for: Wide and deep learning for automatic cell type identification
Source: PubMed Central journal article supplement — Comput Struct Biotechnol J. 2021 Jan 26;19:1052–62. doi: 10.1016/j.csbj.2021.01.027 (PMC7878986; doi:10.1016/j.csbj.2021.01.027), 2021-01-26
Supplement: mmc1.pdf [file mmc1.pdf]

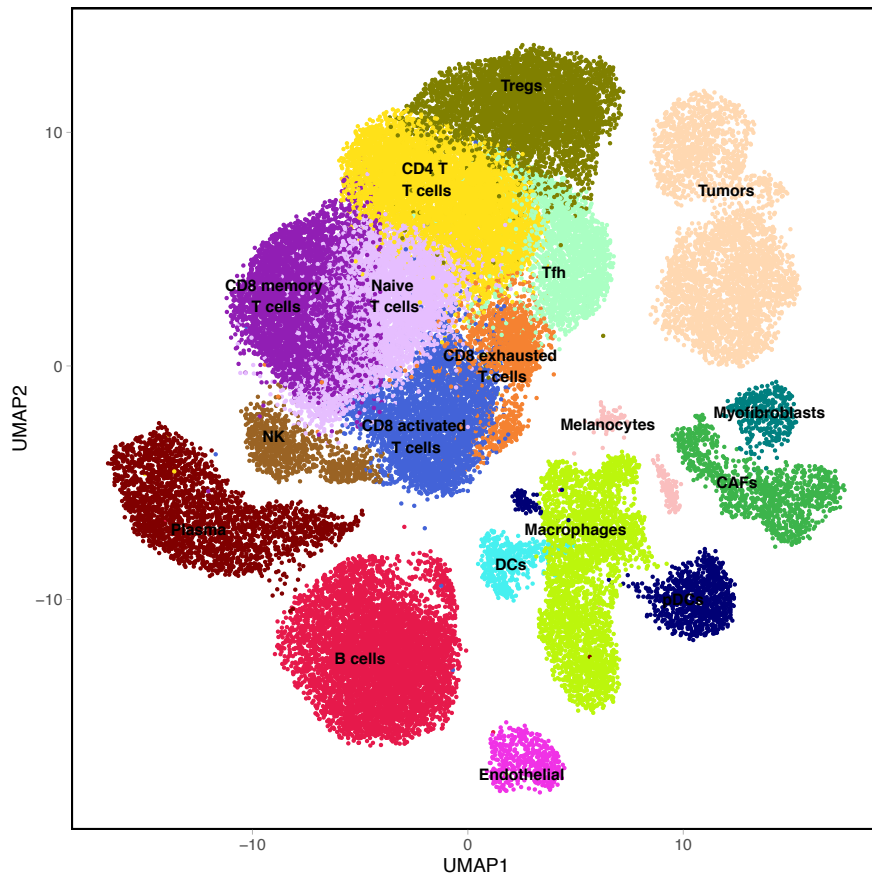

Supplementary Figure 1. UMAP of the Yost et al. basal cell carcinoma single cell RNA-sequencing dataset colored by cell types.

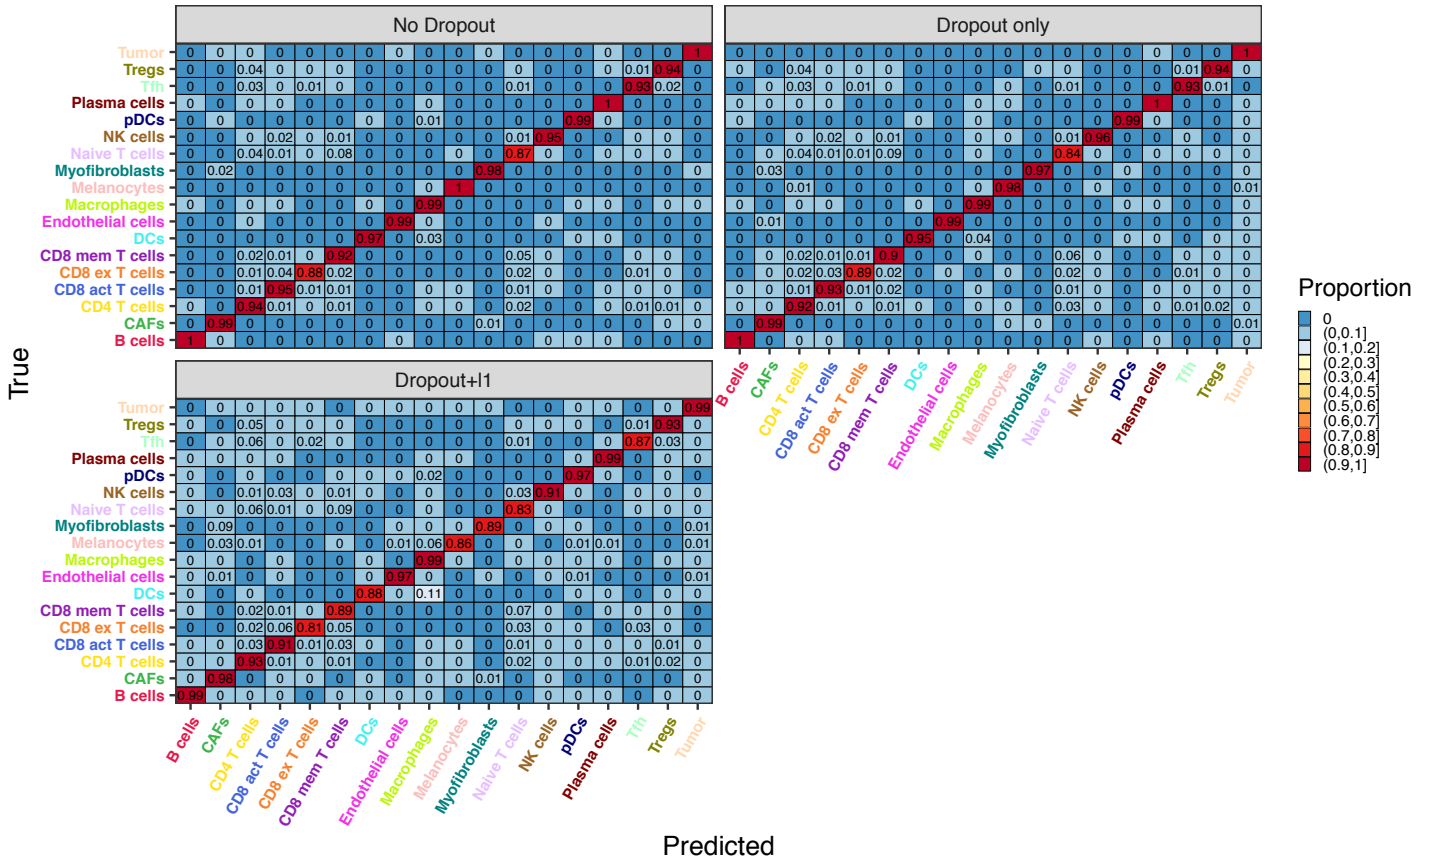

Supplementary Figure 2. Heatmaps of accuracy by cell type of models trained with no dropout (No Dropout), 20% dropout (Dropout Only), and 20% dropout and  $l_1$  regularization (Dropout +  $l_1$ ) using Yost et al. data. Accuracy was calculated by averaging across 10 replications in each model.

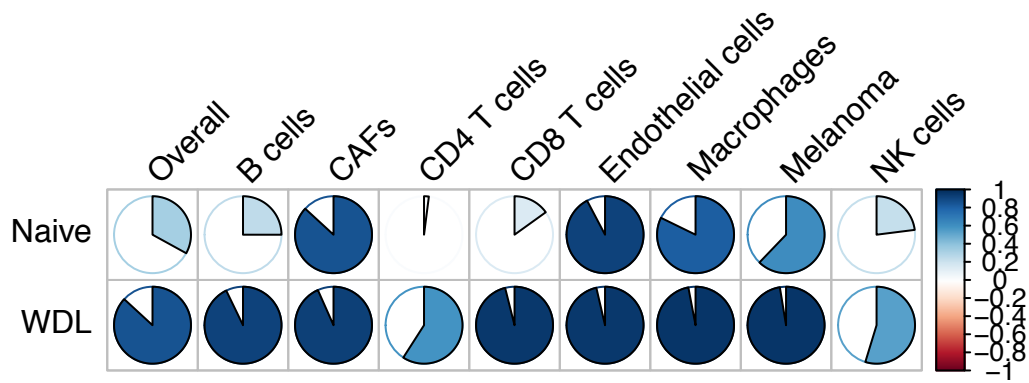

Supplementary Figure 3: Pie chart representations of the overall and by cell type accuracies for both naive and WDL model using Yost et al. data as training and Tirosh et al. data as testing. Accuracy was calculated by averaging across 10 replications in each model.

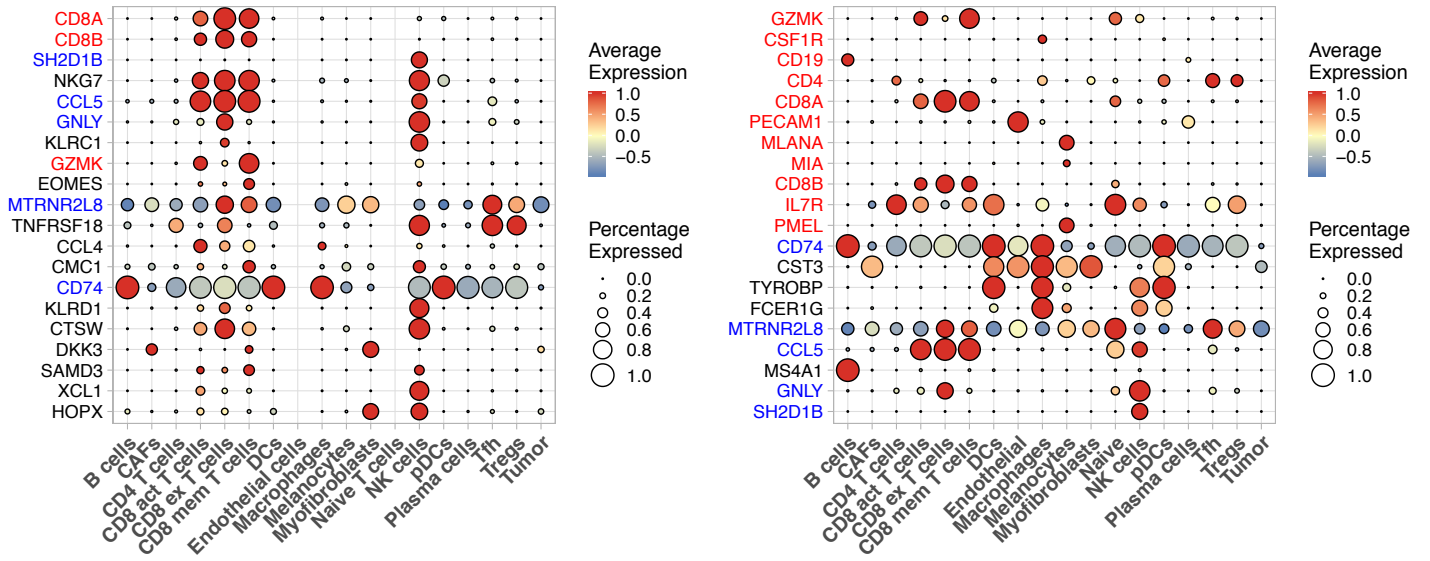

Supplementary Figure 4: Dot plots for the Yost et al. data showing the expression of top 20 markers in naive (A) and WDL (B) models, related to Figure 5. The genes names highlighted in red correspond to genes that were included in the wide part of the WDL model, and the blue gene names correspond to the genes that were not in the wide part yet were influential in both the naive and WDL models.

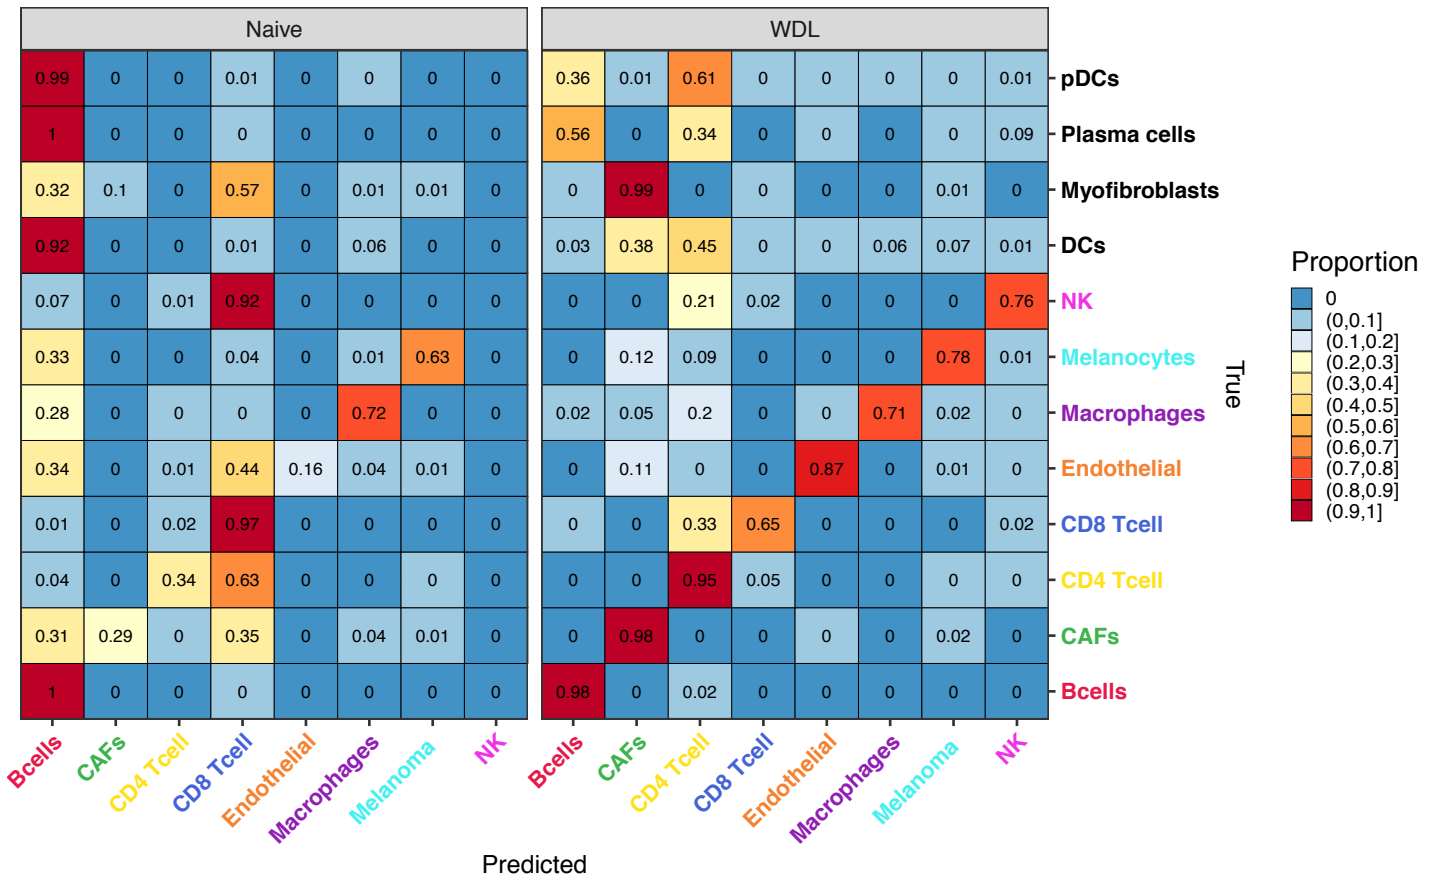

Supplementary Figure 5. Heatmaps of accuracy by cell type of models trained using Tirosh et al. and tested on Yost et al. data. Accuracy was calculated by averaging across 10 replications in each model. Naïve model, Dropout+l2 regularization without wide elements; WDL model, Dropout+l2 regularization with wide elements as genes listed in Figure 1.
